# Supplementary material for: The kinetic acidity of halomethyltrimethylammonium salts †
Source: Royal Society of Chemistry journal article supplement (doi:10.1039/b001689f), 2000-01-01
Supplement: b001689f.doc [file b001689f.doc]

# Supplementary data

# The kinetic acidity of halomethyltrimethylammonium salts

Li Zhang and William R. Dolbier, Jr.*

# Department of Chemistry, University of Florida, Gainesville, FL 32611-7200, USA

**Table 1** Data for the D-exchange of the iodomethylammonium salt, **1a**, at 50 C

| Time/s | *A*t*a* | (2*A*t–*A*0) | ln(2*A*t–*A*0) |
| --- | --- | --- | --- |
| 0 | 20.48 | 20.48 | 3.02 |
| 900 | 19.80 | 19.12 | 2.95 |
| 1800 | 19.12 | 17.76 | 2.88 |
| 2700 | 18.46 | 16.44 | 2.80 |
| 3600 | 17.88 | 15.28 | 2.73 |
| 4500 | 17.37 | 14.26 | 2.66 |
| *a* 1H NMR integral of the -CH2 and CHD peak. | | | |

**Table 2** Data for the D-exchange of the bromomethylammonium salt, **1b**, at 50 C

| Time/s | *A*t | (2*A*t–*A*0) | ln(2*A*t–*A*0) |
| --- | --- | --- | --- |
| 0 | 21.02 | 21.02 | 3.05 |
| 900 | 20.55 | 20.08 | 3.00 |
| 1800 | 19.97 | 18.92 | 2.94 |
| 2700 | 19.42 | 17.82 | 2.88 |
| 3600 | 18.99 | 16.96 | 2.83 |
| 4500 | 18.52 | 16.02 | 2.77 |
| 5400 | 18.04 | 15.06 | 2.71 |

**Table 3** Data for the D-exchange of the chloromethylammonium salt, **1c**, at 50 C

| Time/s | *A*t | (2*A*t–*A*0) | ln(2*A*t–*A*0) |
| --- | --- | --- | --- |
| 0 | 20.98 | 20.98 | 3.04 |
| 2700 | 20.54 | 20.10 | 3.00 |
| 5400 | 20.11 | 19.24 | 2.96 |
| 8100 | 19.72 | 18.46 | 2.92 |
| 10800 | 19.42 | 17.86 | 2.88 |
| 13500 | 19.04 | 17.10 | 2.84 |
| 15300 | 18.78 | 16.58 | 2.81 |

**Table 4** Data for the D-exchange of the *p*-cyanobenzylammonium salt, **4**, at 50 C

| Time/s | *A*t | (2*A*t–*A*0) | ln(2*A*t–*A*0) |
| --- | --- | --- | --- |
| 0 | 21.92 | 21.92 | 3.09 |
| 900 | 21.37 | 20.82 | 3.04 |
| 1800 | 20.67 | 19.42 | 2.97 |
| 2700 | 19.97 | 18.02 | 2.89 |

**Table 5** Data for the D-exchange of chloromethylammonium salt, **1c**, at 65 C

| Time/s | *A*t | (2*A*t–*A*0) | ln(2*A*t–*A*0) |
| --- | --- | --- | --- |
| 0 | 21.68 | 21.68 | 3.08 |
| 2000 | 20.90 | 20.12 | 3.00 |
| 4000 | 19.78 | 17.88 | 2.88 |
| 6000 | 18.32 | 14.96 | 2.70 |
| 8000 | 17.70 | 13.72 | 2.62 |
|  |  |  |  |

**Table 6** Data for the D-exchange of chloromethylammonium salt, **1c**, at 80 C

| Time/s | *A*t | (2*A*t–*A*0) | ln(2*A*t–*A*0) |
| --- | --- | --- | --- |
| 0 | 20.56 | 20.56 | 3.02 |
| 1000 | 18.73 | 16.90 | 2.83 |
| 2000 | 16.50 | 12.44 | 2.52 |
| 3000 | 14.82 | 9.08 | 2.21 |
